August 2014

August 2014

# PSYCHIATRIC SERVICES

A Journal of the  
American Psychiatric  
Association

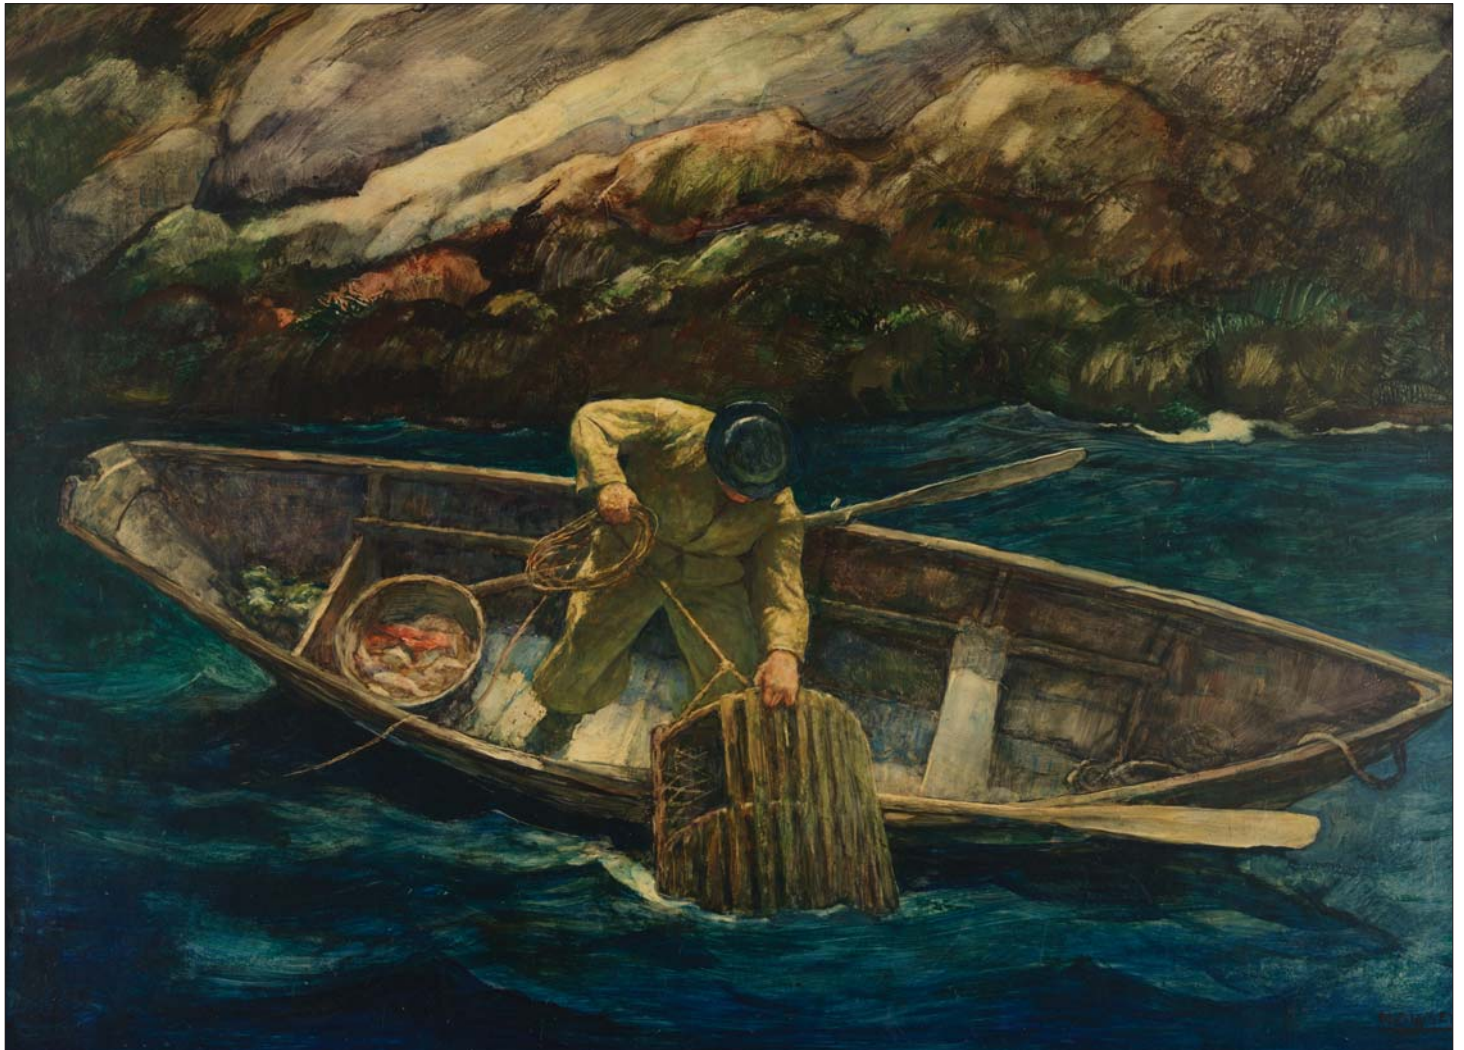

Psychiatric Services

Vol. 65 No. 8 pp. 967-1076

- ◆ Behavioral Health Care for Veterans and OEF Soldiers: Three Current Investigations
- ◆ Treatment-Resistant Depression: Summing the Clinical, Economic, and Societal Costs, 1996–2013
- ◆ Return on Investment of Postdischarge Follow-Up: Analysis of Call Center Data
